# Supplementary material
Source: PubMed Central journal article supplement (PMC4294255)
Supplement: IAI.02032-14_zii999091089so2.pdf [file IAI.02032-14_zii999091089so2.pdf]

**Supplementary Figure 1:** Representation of the gene content of the genomic locus harboring the gene encoding phospholipase C (*MAB\_0555*) of *M. abscessus* (top panel) and comparisons shown with other *mycobacteria* (bottom panel).

**Supplementary Figure 2:** (A) Time-course hydrolysis of p-NPPC by phospholipases C. rMabs-PLC (50 µg) was incubated at 37°C with 5 mM of p-NPPC in 1 mL (final volume) of Tris-HCl (pH 7.2) buffer with 5 mM CaCl<sub>2</sub> and 1.5% sorbitol. The release of p-nitrophenol was monitored at various times at 410 nm. Fifteen microgram of each PLC from *B. cereus* and *C. perfringens* (Sigma) were used as positive control in similar conditions. (B) Temperature effect on rMabs-PLC activity. The optimal temperature was determined by incubating the reaction mixture at different temperatures from 25°C to 55°C in 10 mM Tris-HCl buffer pH 7.2. (C) Effect of pH on rMabs-PLC. The optimal pH was determined by measuring the activity of rPLC at 37°C for 48 h incubation between pH 4 and pH 10 using 10 mM sodium acetate (pH 4-5); 10 mM Mes (pH 6-6.5); 10 mM Tris/HCl (pH 7-8) and 10 mM glycine (pH 9.0) and 10 mM sodium bicarbonate (pH 10) using p-NPPC as substrate.

**Supplementary Table 1: List of Primers used in this study.**

| <b>Primer name</b>       | <b>Primer sequence</b>                        | <b>Restriction site</b> |
|--------------------------|-----------------------------------------------|-------------------------|
|                          | Construction of KO PLC mutant                 |                         |
| <b>PLCF1</b>             | 5'-CGGTCGTAGCCTGAAGCGATG-3'                   |                         |
| <b>PLCR1</b>             | 5'-ACGGCATGAAATGGAAGCCAT-3'                   |                         |
| <b>KM<sub>u</sub>IF1</b> | 5'-CG <u>ACGCGT</u> TAAAACGACGGCCAGTGAAT-3'   | <i>MluI</i>             |
| <b>KM<sub>l</sub>IR1</b> | 5'-CG <u>ACGCGT</u> CAGGAAACAGCTATGACCATGA-3' | <i>MluI</i>             |
| <b>PLCF2</b>             | 5'-ATG <u>CCATGGT</u> CAGCCCGCTGACCGCCGC-3'   | <i>NcoI</i>             |
| <b>PLCR2</b>             | 5'-AACATGAAGCTTGGCGGCGTGGGTACCGC-3'           | <i>HindIII</i>          |
| <b>HyPLCF1</b>           | 5'- <u>CAGCTGACCT</u> CGAACTCCAACAGGTGA-3'    | <i>PvuII</i>            |
| <b>HyPLCR1</b>           | 5'- <u>GTTAACACGG</u> CATGAAATGGAAGCCAT-3'    | <i>HpaI</i>             |
| <b>ZeoF1</b>             | 5'- <u>CCCAAGCTT</u> CAGGCATCAAATAAAACGAAA-3' | <i>HindIII</i>          |
| <b>ZeoR1</b>             | 5'- <u>CCATCGATT</u> CAGTCCTGCTCCTCGGCCAC-3'  | <i>Clal</i>             |
| <b>RHF1</b>              | 5'-ATCTGATGCACGACGAATCA-3'                    |                         |
| <b>RHR1</b>              | 5'-CGTAGGTGGTCCAGCCATAG-3'                    |                         |
| <b>0555F</b>             | 5'-CCCGCGGTGTCCTGGCTCATC-3'                   |                         |
| <b>0555R</b>             | 5'-TGATACCGCCAGCGCCGCAGA-3'                   |                         |
|                          | Quantitative PCR                              |                         |
| <b>PLCRTF</b>            | 5'CATTACTTCGGCACCCCTGTC3'                     |                         |
| <b>PLCRTR</b>            | 5'ATGAGCAGCCATCCAGTTGT3'                      |                         |
